## RESEARCH ARTICLE

# Depression during the COVID-19 pandemic among older Canadians with peptic ulcer disease: Analysis of the Canadian Longitudinal Study on Aging

Esme Fuller-Thomson<sup>1,2\*</sup>, Hannah Dolhai<sup>1,2</sup>, Andie MacNeil<sup>1,2</sup>, Grace Li<sup>3</sup>, Ying Jiang<sup>4</sup>, Margaret De Groh<sup>4</sup>

**1** Factor-Inwentash Faculty of Social Work, University of Toronto, Toronto, Ontario, Canada, **2** Institute for Life Course and Aging, University of Toronto, Toronto, Ontario, Canada, **3** Department of Sociology, University of Victoria, Victoria, British Columbia, Canada, **4** Applied Research Division, Center for Surveillance and Applied Research, Public Health Agency of Canada, Ottawa, Ontario, Canada

\* [esme.fuller.thomson@utoronto.ca](mailto:esme.fuller.thomson@utoronto.ca)

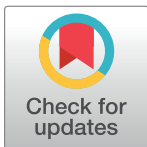

## OPEN ACCESS

**Citation:** Fuller-Thomson E, Dolhai H, MacNeil A, Li G, Jiang Y, De Groh M (2023) Depression during the COVID-19 pandemic among older Canadians with peptic ulcer disease: Analysis of the Canadian Longitudinal Study on Aging. *PLoS ONE* 18(10): e0289932. <https://doi.org/10.1371/journal.pone.0289932>

**Editor:** Sungwoo Lim, New York City Department of Health and Mental Hygiene, UNITED STATES

**Received:** September 11, 2022

**Accepted:** July 29, 2023

**Published:** October 18, 2023

**Copyright:** © 2023 Fuller-Thomson et al. This is an open access article distributed under the terms of the [Creative Commons Attribution License](https://creativecommons.org/licenses/by/4.0/), which permits unrestricted use, distribution, and reproduction in any medium, provided the original author and source are credited.

**Data Availability Statement:** The research reported in this study was conducted using the CLSA Baseline Comprehensive Dataset version 6.0, Baseline Tracking Dataset version 3.7, Follow-up 1 Comprehensive Dataset version 3.0 and Follow-up 1 Tracking Dataset version 2.2, COVID-19 Questionnaire Study Dataset version 1.0 under Application ID 2104024. Under the requirements of our contract, the authors of this study are not permitted to share the data. However, data are available directly from the Canadian Longitudinal

## Abstract

The COVID-19 pandemic and associated public health measures have exacerbated many known risk factors for depression that may be particularly concerning for individuals with chronic health conditions, such as peptic ulcer disease (PUD). In a large longitudinal sample of older adults with PUD, the current study examined the incidence of depression during the pandemic among those without a pre-pandemic history of depression ( $n = 689$ ) and the recurrence of depression among those with a history of depression ( $n = 451$ ). Data came from four waves of the Canadian Longitudinal Study on Aging (CLSA). Multivariate logistic regression analyses were conducted to identify factors associated with incident and recurrent depression. Among older adults with PUD and without a history of depression, approximately 1 in 8 (13.0%) developed depression for the first time during the COVID-19 pandemic. Among those with a history of depression, approximately 1 in 2 (46.6%) experienced depression during the pandemic. The risk of incident depression and recurrent depression was higher among those who were lonely, those with functional limitations, and those who experienced an increase in family conflict during the pandemic. The risk of incident depression only was higher among women, individuals whose income did not satisfy their basic needs, those who were themselves ill and/or those whose loved ones were ill or died during the pandemic, and those who had disruptions to healthcare access during the pandemic. The risk of recurrent depression only was higher among those with chronic pain and those who had difficulty accessing medication during the pandemic. Implications for interventions are discussed.

## Introduction

Since the start of the COVID-19 pandemic, there have been more than 6.9 million fatalities worldwide [1], with the United States and Canada experiencing more than 1.1 million and 52,000 deaths, respectively [1, 2]. In response to the pandemic, governments enacted public

Study on Aging ([www.clsa-elcv.ca](http://www.clsa-elcv.ca)) for researchers who meet the criteria for access to de-identified CLSA data by contacting [access@clsa-elcv.ca](mailto:access@clsa-elcv.ca).

**Funding:** Funding for the Canadian Longitudinal Study on Aging (CLSA) is provided by the Government of Canada through the Canadian Institutes of Health Research (CIHR) under grant reference: LSA 94473 and the Canada Foundation for Innovation, as well as the following provinces, Newfoundland, Nova Scotia, Quebec, Ontario, Manitoba, Alberta, and British Columbia. This research was supported, in part, by the Canadian Institutes of Health Research (CIHR) grant #172862, PI: Fuller-Thomson. Andie MacNeil received funding from the Public Health Agency of Canada to support this research. The funders had no role in study design, data collection and analysis, decision to publish, or preparation of the manuscript.

**Competing interests:** The authors have declared that no competing interests exist.

health measures to mitigate the spread of the virus, such as stay-at-home orders and non-essential business closures. The resulting increases in social isolation and economic precarity, combined with reduced access to health and mental health resources have contributed to declines in physical and mental wellbeing [3, 4] and increases in the prevalence of depression and anxiety in the general population [5, 6].

One particular subpopulation known to have elevated depression prior to the COVID-19 pandemic is individuals with peptic ulcer disease (PUD) [7–9]. PUD is a painful condition in which open gastric sores or ulcers develop in the lining of the stomach or the upper portion of the small intestine. The leading causes of PUD are *Helicobacter pylori* (*H. pylori*) infection and long-term use of nonsteroidal anti-inflammatory drugs (NSAIDs), such as aspirin and ibuprofen [10, 11]. Psychological stress is also a major factor contributing to the onset of PUD, as well as the severity of its course [12, 13]. The lifetime prevalence of PUD in the general population is an estimated 5–10% [14]. PUD symptoms, such as bleeding and chronic pain, often disrupt usual activities in daily life, and can result in a dramatically lower quality of life for these individuals [15, 16]. While previous studies have established that depression is associated with an increased risk of developing PUD [8, 9], emerging research suggests that this relationship may be bidirectional, and that those with PUD also face a heightened risk of developing depression [7]. A recent longitudinal study examined the relationship between PUD and depression, and found that individuals with PUD had an adjusted hazard ratio for depression that was 1.68-fold higher than the control group without PUD, even when their demographic factors and other medical history were matched [7].

To date, there has not been a large longitudinal study examining the impact of the COVID-19 pandemic on the mental health of individuals with PUD. While the COVID-19 pandemic exacerbated many risk factors for depression in the general population, there were particular stressors for those with chronic health conditions, who often faced disruptions to their usual healthcare access and increased stress over the risk of COVID-19 [17, 18]. This likely impacted individuals with PUD. Additionally, research conducted prior to the pandemic has attributed the elevated risk of depression among those with PUD to the presence of pain, reduced quality of life, and high levels of stress [7, 19], many of which were likely exacerbated due to the pandemic. Stay-at-home orders and physical distancing limitations had many unintended consequences, such as increases in loneliness and social isolation. It is also possible that the stress of the COVID-19 pandemic led to worsening PUD symptoms, which in turn can lead to worsening mental health outcomes among this population [19]. Collectively, these factors highlight the potentially detrimental impact of the pandemic on the mental health of individuals with PUD.

When considering the high comorbidity between PUD and depression prior to the pandemic, combined with the unprecedented stressors of the COVID-19 pandemic, it is evident that there is a need for longitudinal research to examine the relationship between PUD and the occurrence or recurrence of depression during the pandemic. The current study addresses this gap by using a large Canadian longitudinal panel study of older adults to achieve the following objectives: (1) in a sample of older adults with PUD without a history of depression, to determine the factors associated with developing incident depression during the COVID-19 pandemic; (2) in a sample of older adults with PUD and a history of depression, to identify factors associated with the recurrence of depression during the pandemic.

## Materials and methods

### Data source

As has been described elsewhere [20, 21], data were drawn from the Baseline, Follow-up 1, COVID Spring 2020, and COVID Autumn 2020 waves of the comprehensive cohort of

Canadian Longitudinal Study on Aging (CLSA). The CLSA is a national study of Canadian residents aged 45 to 85 between 2011 and 2015 across 10 provinces [22, 23]. Participation in the CLSA cohort is voluntary and all individuals provide written informed consent [22]. The CLSA also collected data about COVID-19, either online or by telephone, with all CLSA respondents who agreed to participate. The Baseline comprehensive cohort recruited 30,097 community-living men and women in Canada. The study was designed to follow participants every 3 years after Baseline for at least 20 years or until death [22]. In total, 27,737 participants of the comprehensive cohort completed the first follow-up wave (hereafter Follow-up 1) in 2018. In order to investigate the impact of the COVID-19 pandemic among older Canadians, 18,530 and 15,544 of the participants in the comprehensive cohort completed the COVID-19 Spring 2020 and Autumn 2020 questionnaires (hereafter Spring 2020 and Autumn 2020). A detailed description of the CLSA can be found elsewhere [22, 23].

All Canadian Longitudinal Study on Aging (CLSA) waves of data collection have been approved by research ethics boards at all collaborating Canadian institutions. The CLSA was conducted in accordance with the 1964 Helsinki declaration and its later amendments, and with the ethical standards of each institutional research committee. The current study was approved by the University of Toronto's Research Ethics Board (Protocol #41167; approved June 4, 2021).

## Sample

The sample consisted of respondents who had PUD in either Baseline or Follow-up 1 prior to the COVID-19 pandemic. Self-reported PUD was measured by the question, "Has a doctor ever told you that you have intestinal or stomach ulcers?" (yes vs. no). There were 1,293 individuals who reported having PUD. Out of these individuals, 11.8% ( $n = 153$ ) had missing data on at least one of the covariates and were removed from the analysis. This resulted in a final sample size of 1,140. The variable with the highest percentage of missing was adverse childhood experiences (ACEs), with 2.6% of respondents ( $n = 33$ ) missing data. The demographic characteristics of respondents who were excluded from the analyses due to missing data were compared to those included in the analyses, and the results showed that they were comparable. Additionally, the missing values appeared to be random and lacked any discernible pattern. Among the final sample of those who reported having PUD and who had data on all covariates ( $n = 1,140$ ), 689 had no pre-pandemic history of depression and 451 had a history of depression.

## Measures

The outcome of interest, depression, was assessed by administering the short form of the Centre for Epidemiologic Studies–Depression (CES-D-10) scale [24]. Ten questions addressing, for example, feelings of depression, loneliness, hopefulness for the future, and restless sleep, are summed to generate a total score between 0 and 30 with higher scores indicating a greater number of symptoms. The positive screen for depression was coded 1 if the CES-D-10 score was 10 or more and 0 otherwise [24].

To identify pre-pandemic history of depression, four measures were used. The CES-D-10 scores at Baseline and Follow-up 1 wave of data collection were assessed. At both Baseline and Follow-up 1 the respondents were also asked: "Has a doctor ever told you that you suffer from clinical depression?". If respondents answered no at both the Baseline and Follow-up 1 waves of data collection, and screened negative on the CES-D-10 in both waves, the respondent was classified as having no pre-pandemic history of depression. If at least one of the above four measures indicated depression, the respondent was classified as having a pre-pandemic history of depression.

Demographic factors included age at the Autumn 2020 wave, sex (male vs. female), and marital status (married/common-law, separated/divorced/widowed, single/never married or lived with a partner). Immigrant status was categorized into two groups based on country of origin (Canadian-born vs. immigrant). Visible minority status was classified as white vs. non-white.

Socioeconomic status was measured by education, household income, house ownership, total savings, and whether income satisfies basic needs. We operationalized education as the highest level of education achieved, categorized as less than secondary school, secondary school/some post-secondary, and post-secondary degree/diploma. Household income was defined as total household income from all sources by all family members in the past 12 months (less than \$50,000, \$50,000–\$99,999, \$100,000 or more, and not answered). House ownership had three categories (rent, own with mortgage, own without mortgage). Total saving had four categories (less than \$50,000, \$50,000–\$99,999, \$100,000 or more, and not answered). Whether income satisfies basic needs was measured by a dummy variable (0 = with some difficulty/not very well/totally inadequate; and 1 = very well/adequately).

Health-related variables include body mass index (BMI), chronic pain, and multimorbidity. BMI was classified into three clusters: underweight/normal weight (BMI < 25.0); overweight (BMI = 25.0–29.9); and obese (BMI ≥ 30.0). Chronic pain was a dummy variable (free of chronic pain vs. have chronic pain). Multimorbidity was defined as having multiple chronic conditions (zero, one, two, three or more, missing). These chronic conditions include (1) diabetes, (2) heart disease, (3) peripheral vascular disease or poor circulation in limbs, (4) dementia or Alzheimer's disease, (5) multiple sclerosis, (6) epilepsy, (7) migraine headaches, (8) chronic obstructive pulmonary disease or asthma, (9) bowel disorder, (10) stroke or CVA (cerebrovascular accident), (11) glaucoma, (12) kidney disease, (13) macular degeneration, (14) ministroke or TIA (Transient Ischemic Attack), and (15) Parkinson's Disease, and (16) cancer.

Adverse childhood experiences (ACEs) were measured by childhood physical abuse, childhood sexual abuse, childhood exposure to intimate partner violence, and being neglected. Childhood physical abuse was present if the respondent reported being kicked, bit, punched, choked, burned, or physically attacked in some other way one or more times. Childhood sexual abuse was present if respondents reported an adult forcing them or attempting to force them into any unwanted sexual activity by threatening them, holding them down, or hurting them in some way one or more times. Childhood exposure to intimate partner violence was present if respondents reported seeing or hearing parents, step-parents or guardians hitting each other more than 10 times. Respondents being neglected were present if they reported their parents or guardians not having taken care of their basic needs such as keeping clean or providing food or clothing one or more times.

Respondents were also asked: "How often do you feel that you lack companionship?", "How often do you feel left out?", and "How often do you feel isolated from others?". The three variables were coded as 1 = often and 0 = hardly ever/some of the time.

Religiosity was measured by two questions: "In the past 12 months, how often did you participate in church or religious activities?" and "In the past 12 months, how often did you engage in religious or spiritual activities including prayer, meditation taking place at home?". If respondents had taken part in these activities at least once a month, then they were coded as often (= 1) otherwise rare (= 0).

At the beginning of the COVID-19 pandemic, the Spring 2020 questionnaire asked respondents whether they left home or not in the past month. Moreover, respondents' loneliness during the Spring 2020 wave was operationalized using the question, "How often did you feel lonely?" (rarely or never/some of the time [0–2 days per week] vs. occasionally/all of the time

[3–7 days per week]). The type of dwelling during the COVID-19 pandemic was classified as house, apartment, or other. There was a dummy variable indicating whether respondents lived alone or not during the beginning of the COVID-19 pandemic.

The functional limitation scale included three questions: “Do you have any difficulty standing up after sitting in a chair”, “Do you have any difficulty walking alone up and down a flight of stairs?”, and “Do you have any difficulty walking 2 to 3 neighborhood blocks?”. If respondents answered all three questions as no, then they were coded as 0, otherwise 1.

COVID-19-related stressors were measured at the Autumn 2020 wave. They were investigated in a section of the survey which was preceded by the following instructions: “Which of the following have you experienced during the COVID-19 pandemic?” COVID-19 related stressors/experiences were categorized into five composite indicators. Experiences were grouped as “yes” if the participants responded yes to at least one experience in the specific category or no if the participant responded no to all questions in that category. Questions related to health stressors included, “You were ill”, “People close to you were ill”, and/or “Death of a person close to you”. Questions related to difficulties with accessing resources included “Loss of income” and/or “Unable to access necessary supplies or food”. Questions related to family conflict included “Increased verbal or physical conflict” and/or “Breakdown in family/marital relationships”. Questions related to other family issues included “Separation from family”, “Increased time caregiving”, and/or “Unable to care for people who require assistance due to health condition or limitation”. Questions related to health care included “Unable to access my usual healthcare”. Questions related to medication included “Unable to get my usual prescription medications and treatments”.

## Analyses

The analysis was conducted in several steps. The variables included in the analyses were determined a priori based upon the existing literature on risk factors associated with depression among older adults [25]. First, descriptive statistics were used to characterize the CLSA participants with PUD, both with and without a pre-pandemic history of depression. We further compared the distribution of key risk factors among older adults with PUD and no pre-pandemic history of depression who did not develop depression and those who develop depression, and older adults with PUD and a history of pre-pandemic depression who did not and those who did develop depression during the pandemic. In order to compare the pandemic incident and recurrent depression rates to pre-pandemic rates, we conducted a sensitivity analysis examining changes in depression from Baseline to Follow-up 1. Chi-square tests and independent t-tests were used to test the statistical differences at the bivariate level. Next, multivariable logistic regression was utilized to analyze incident depression among older adults with PUD who had no prior history of depression. In contrast, relative risk regression was employed to examine the relationship between depression and older adults with PUD who had a pre-existing history of depression. When the outcome of interest is rare, logistic regression is commonly used to estimate the odds ratio, which provides an approximation of the relative risk. However, when the outcome is not rare, a relative risk model is more appropriate as it directly estimates the relative risk, offering a more accurate measure of the association between the predictors and the outcome [26]. The dependent variable is based on the presence or absence of a positive screen for depression based on the CES-D-10 scores at the Autumn 2020 survey. All hypothesis tests were two-sided and p-values less than 0.05 were considered statistically significant. In order to evaluate the goodness-of-fit of logistic models, Nagelkerke R square was reported. We calculated the variance inflation factor (VIF) to assess the multicollinearity among the independent variables in the logistic regression. The VIF values were all

below 5, which suggests multicollinearity is not problematic. We also calculated the VIF to assess multicollinearity among the socioeconomic status variables, and we found no evidence for multicollinearity as all VIF values were below 5. Data manipulation and statistical analyses were performed using R version 4.1.3.

## Results

**Table 1** presents the sample characteristics of individuals with PUD by pre-pandemic depression status (estimated using CES-D-10 score and self-reported clinical depression diagnosis). A larger proportion of female respondents had a pre-pandemic history of depression than male respondents. A higher proportion of separated/divorced/widowed respondents and single respondents had a pre-pandemic history of depression than those who were married or living common-law. Sociodemographic and health-related variables were different between those who were free of pre-pandemic depression and those who had a history of depression. Respondents who had no history of pre-pandemic depression had a higher household income, owned their house without mortgage, had more savings, had enough income to satisfy needs, were under or normal weight, free of chronic pain, and had no multimorbidity when compared to those who had a history of pre-pandemic depression. A higher proportion of respondents who had a history of pre-pandemic depression felt a lack of companionship, felt left out, felt isolated from others, felt lonely during the pandemic, had functional limitations, and experienced COVID-related stressors.

**Table 2** displays the characteristics of older adults with PUD with and without a history of depression who did not develop depression and who developed depression. Among older adults with PUD and no pre-pandemic history of depression, 13.0% developed depression during the pandemic. Among older adults with PUD with a history of depression, nearly half (46.6%) were depressed during the pandemic. More than 7 in 10 older adults with PUD (71.2%) who screened positive for depression based on CES-D-10 scores at both the Baseline and Follow-up 1 waves were depressed in the Autumn 2020 wave, compared to half of those (50.0%) who screened positive for depression based on CES-D-10 scores at Follow-up 1 wave, but not at Baseline, and 44.1% of those whose CES-D-10 scores indicated depression at Baseline, but not at Follow-up 1. In contrast, 29.0% of those who screened negative for depression on the CES-D-10 scores at both Baseline and Follow-up 1 waves, but who reported that they had been diagnosed by a health professional at some point in their life, developed depression during the pandemic.

We conducted a sensitivity analysis to compare these findings on incident and recurrent depression among older adults with PUD during the COVID-19 pandemic to pre-pandemic patterns from the Baseline to the Follow-up 1 wave. Among those who reported they had no history of depression and a CES-D-10 score less than 10 at Baseline, the incidence of new depression at Follow-up 1 according to the CES-D-10 was 7.5% (95% CI: 5.4%, 9.6%). Among those who had a CES-D-10 score of 10 or more and/or a self-reported history of a medical diagnosis of depression at Baseline, the prevalence of depression at Follow-up 1 was 37.9% (95% CI: 32.4%, 43.5%). As reported above, the COVID-19 incidence and recurrence rates of depression were substantially higher than pre-pandemic rates.

**Table 3** presents the multivariate logistic regression model on incident depression status during Autumn 2020 for older adults with PUD and no history of depression. Female respondents had substantially higher odds of incident depression than male respondents during the COVID-19 pandemic (OR = 2.03, 95% CI [1.13; 3.69],  $p = 0.021$ ). Older adults with PUD who felt lonely occasionally/all of the time during the first few months of the pandemic had a significantly higher prevalence of depression by Autumn 2020 compared to those who felt lonely

Table 1. Characteristics of CLSA respondents with PUD (n = 1,140).

|                               | Overall sample of older adults with PUD (n = 1,140) | Older adults with PUD with no pre-pandemic history of depression (n = 689) | Older adults with PUD with a pre-pandemic history of depression (n = 451) | p-value | Source of data   |
|-------------------------------|-----------------------------------------------------|----------------------------------------------------------------------------|---------------------------------------------------------------------------|---------|------------------|
| Depression during Autumn 2020 |                                                     |                                                                            |                                                                           |         | CLSA Autumn 2020 |
| No                            | 842 (73.9%)                                         | 600 (87.1%)                                                                | 242 (53.7%)                                                               |         |                  |
| Yes                           | 298 (26.1%)                                         | 89 (12.9%)                                                                 | 209 (46.3%)                                                               |         |                  |
| Age (Mean, SD)                | 64.06 (9.07)                                        | 64.84 (8.94)                                                               | 62.86 (9.15)                                                              | <0.001  | CLSA Autumn 2020 |
| Sex                           |                                                     |                                                                            |                                                                           | <0.001  | CLSA Baseline    |
| Female                        | 598 (52.5%)                                         | 315 (45.7%)                                                                | 283 (62.7%)                                                               |         |                  |
| Male                          | 542 (47.5%)                                         | 374 (54.3%)                                                                | 168 (37.3%)                                                               |         |                  |
| Marital status                |                                                     |                                                                            |                                                                           | <0.001  | CLSA Follow-up 1 |
| Married/Common-law            | 758 (66.5%)                                         | 492 (71.4%)                                                                | 266 (59.0%)                                                               |         |                  |
| Separated/Divorced/Widowed    | 276 (24.2%)                                         | 147 (21.3%)                                                                | 129 (28.6%)                                                               |         |                  |
| Single                        | 106 (9.3%)                                          | 50 (7.3%)                                                                  | 56 (12.4%)                                                                |         |                  |
| Immigrant status              |                                                     |                                                                            |                                                                           | 0.025   | CLSA Baseline    |
| No                            | 947 (83.1%)                                         | 558 (81.0%)                                                                | 389 (86.3%)                                                               |         |                  |
| Yes                           | 193 (16.9%)                                         | 131 (19.0%)                                                                | 62 (13.7%)                                                                |         |                  |
| Visible minority status       |                                                     |                                                                            |                                                                           | 0.893   | CLSA Baseline    |
| No                            | 1,087 (95.4%)                                       | 656 (95.2%)                                                                | 431 (95.6%)                                                               |         |                  |
| Yes                           | 53 (4.6%)                                           | 33 (4.8%)                                                                  | 20 (4.4%)                                                                 |         |                  |
| Education                     |                                                     |                                                                            |                                                                           | 0.253   | CLSA Baseline    |
| Less than secondary school    | 79 (6.9%)                                           | 43 (6.2%)                                                                  | 36 (8.0%)                                                                 |         |                  |
| Some post-secondary school    | 203 (17.8%)                                         | 116 (16.8%)                                                                | 87 (19.3%)                                                                |         |                  |
| Post-secondary degree/diploma | 858 (75.3%)                                         | 530 (76.9%)                                                                | 328 (72.7%)                                                               |         |                  |
| Household income              |                                                     |                                                                            |                                                                           | <0.001  | CLSA Follow-up 1 |
| Less than \$50,000            | 294 (25.8%)                                         | 139 (20.2%)                                                                | 155 (34.4%)                                                               |         |                  |
| \$50,000–\$99,999             | 441 (38.7%)                                         | 277 (40.2%)                                                                | 164 (36.4%)                                                               |         |                  |
| \$100,000 or more             | 343 (30.1%)                                         | 229 (33.2%)                                                                | 114 (25.3%)                                                               |         |                  |
| Missing                       | 62 (5.4%)                                           | 44 (6.4%)                                                                  | 18 (4.0%)                                                                 |         |                  |
| House ownership               |                                                     |                                                                            |                                                                           | <0.001  | CLSA Follow-up 1 |
| Rent                          | 185 (16.2%)                                         | 76 (11.0%)                                                                 | 109 (24.2%)                                                               |         |                  |
| Own with mortgage             | 313 (27.5%)                                         | 175 (25.4%)                                                                | 138 (30.6%)                                                               |         |                  |
| Own without mortgage          | 622 (54.6%)                                         | 426 (61.8%)                                                                | 196 (43.5%)                                                               |         |                  |
| Missing                       | 20 (1.8%)                                           | 12 (1.7%)                                                                  | 8 (1.8%)                                                                  |         |                  |
| Total saving                  |                                                     |                                                                            |                                                                           | <0.001  | CLSA Follow-up 1 |
| Less than \$49,999            | 247 (21.7%)                                         | 110 (16.0%)                                                                | 137 (30.4%)                                                               |         |                  |
| \$50,000–\$99,999             | 150 (13.2%)                                         | 83 (12.0%)                                                                 | 67 (14.9%)                                                                |         |                  |

(Continued)

Table 1. (Continued)

|                                              | Overall sample of older adults with PUD (n = 1,140) | Older adults with PUD with no pre-pandemic history of depression (n = 689) | Older adults with PUD with a pre-pandemic history of depression (n = 451) | p-value | Source of data   |
|----------------------------------------------|-----------------------------------------------------|----------------------------------------------------------------------------|---------------------------------------------------------------------------|---------|------------------|
| \$100,000 or more                            | 655 (57.5%)                                         | 439 (63.7%)                                                                | 216 (47.9%)                                                               |         |                  |
| Missing                                      | 88 (7.7%)                                           | 57 (8.3%)                                                                  | 31 (6.9%)                                                                 |         |                  |
| Whether income satisfies needs               |                                                     |                                                                            |                                                                           | <0.001  | CLSA Baseline    |
| No                                           | 111 (9.7%)                                          | 38 (5.5%)                                                                  | 73 (16.2%)                                                                |         |                  |
| Yes                                          | 1,029 (90.3%)                                       | 651 (94.5%)                                                                | 378 (83.8%)                                                               |         |                  |
| BMI                                          |                                                     |                                                                            |                                                                           | <0.001  | CLSA Follow-up 1 |
| Underweight or normal weight                 | 288 (25.3%)                                         | 187 (27.1%)                                                                | 101 (22.4%)                                                               |         |                  |
| Overweight                                   | 466 (40.9%)                                         | 307 (44.6%)                                                                | 159 (35.3%)                                                               |         |                  |
| Obese                                        | 386 (33.9%)                                         | 195 (28.3%)                                                                | 191 (42.4%)                                                               |         |                  |
| Chronic pain                                 |                                                     |                                                                            |                                                                           | <0.001  | CLSA Follow-up 1 |
| No                                           | 652 (57.2%)                                         | 451 (65.5%)                                                                | 201 (44.6%)                                                               |         |                  |
| Yes                                          | 488 (42.8%)                                         | 238 (34.5%)                                                                | 250 (55.4%)                                                               |         |                  |
| Multimorbidity                               |                                                     |                                                                            |                                                                           | <0.001  | CLSA Follow-up 1 |
| 0                                            | 235 (20.6%)                                         | 169 (24.5%)                                                                | 66 (14.6%)                                                                |         |                  |
| 1                                            | 314 (27.5%)                                         | 210 (30.5%)                                                                | 104 (23.1%)                                                               |         |                  |
| 2                                            | 259 (22.7%)                                         | 146 (21.2%)                                                                | 113 (25.1%)                                                               |         |                  |
| 3+                                           | 289 (25.4%)                                         | 138 (20.0%)                                                                | 151 (33.5%)                                                               |         |                  |
| Missing                                      | 43 (3.8%)                                           | 26 (3.8%)                                                                  | 17 (3.8%)                                                                 |         |                  |
| Feel that lack companionship                 |                                                     |                                                                            |                                                                           | <0.001  | CLSA Follow-up 1 |
| No                                           | 1,059 (92.9%)                                       | 670 (97.2%)                                                                | 389 (86.3%)                                                               |         |                  |
| Yes                                          | 81 (7.1%)                                           | 19 (2.8%)                                                                  | 62 (13.7%)                                                                |         |                  |
| Feel left out                                |                                                     |                                                                            |                                                                           | <0.001  | CLSA Follow-up 1 |
| No                                           | 1,098 (96.3%)                                       | 680 (98.7%)                                                                | 418 (92.7%)                                                               |         |                  |
| Yes                                          | 42 (3.7%)                                           | 9 (1.3%)                                                                   | 33 (7.3%)                                                                 |         |                  |
| Feel isolated from others                    |                                                     |                                                                            |                                                                           | <0.001  | CLSA Follow-up 1 |
| No                                           | 1,104 (96.8%)                                       | 686 (99.6%)                                                                | 418 (92.7%)                                                               |         |                  |
| Yes                                          | ----                                                | ----                                                                       | ----                                                                      |         |                  |
| Church or religious activities               |                                                     |                                                                            |                                                                           | <0.001  | CLSA Follow-up 1 |
| Rarely                                       | 767 (67.3%)                                         | 435 (63.1%)                                                                | 332 (73.6%)                                                               |         |                  |
| Often                                        | 373 (32.7%)                                         | 254 (36.9%)                                                                | 119 (26.4%)                                                               |         |                  |
| Religious activities at home                 |                                                     |                                                                            |                                                                           | 0.870   | CLSA Follow-up 1 |
| Rarely                                       | 511 (44.8%)                                         | 307 (44.6%)                                                                | 204 (45.2%)                                                               |         |                  |
| Often                                        | 629 (55.2%)                                         | 382 (55.4%)                                                                | 247 (54.8%)                                                               |         |                  |
| Adverse childhood experience (Mean, SD)      | 0.31 (0.70)                                         | 0.20 (0.56)                                                                | 0.48 (0.84)                                                               | <0.001  | CLSA Follow-up 1 |
| Left home in the past one month during COVID |                                                     |                                                                            |                                                                           | 0.361   | CLSA Spring 2020 |
| No                                           | 92 (8.1%)                                           | 51 (7.4%)                                                                  | 41 (9.1%)                                                                 |         |                  |

(Continued)



Table 1. (Continued)

|                                               | Overall sample of older adults with PUD (n = 1,140) | Older adults with PUD with no pre-pandemic history of depression (n = 689) | Older adults with PUD with a pre-pandemic history of depression (n = 451) | p-value | Source of data   |
|-----------------------------------------------|-----------------------------------------------------|----------------------------------------------------------------------------|---------------------------------------------------------------------------|---------|------------------|
| Yes                                           | 1,048 (91.9%)                                       | 638 (92.6%)                                                                | 410 (90.9%)                                                               |         |                  |
| How often do you feel lonely during COVID     |                                                     |                                                                            |                                                                           | <0.001  | CLSA Spring 2020 |
| Rarely or never/Some of the time              | 940 (82.5%)                                         | 620 (90.0%)                                                                | 320 (71.0%)                                                               |         |                  |
| Occasionally/All of the time                  | 200 (17.5%)                                         | 69 (10.0%)                                                                 | 131 (29.0%)                                                               |         |                  |
| Type of dwelling                              |                                                     |                                                                            |                                                                           | <0.001  | CLSA Spring 2020 |
| House                                         | 835 (73.2%)                                         | 532 (77.2%)                                                                | 303 (67.2%)                                                               |         |                  |
| Apartment                                     | 258 (22.6%)                                         | 144 (20.9%)                                                                | 114 (25.3%)                                                               |         |                  |
| Others                                        | 47 (4.1%)                                           | 13 (1.9%)                                                                  | 34 (7.5%)                                                                 |         |                  |
| Living along during the COVID-19 pandemic     |                                                     |                                                                            |                                                                           | <0.001  | CLSA Spring 2020 |
| No                                            | 825 (72.4%)                                         | 529 (76.8%)                                                                | 296 (65.6%)                                                               |         |                  |
| Yes                                           | 315 (27.6%)                                         | 160 (23.2%)                                                                | 155 (34.4%)                                                               |         |                  |
| Functional limitation                         |                                                     |                                                                            |                                                                           | <0.001  | CLSA Autumn 2020 |
| No                                            | 786 (68.9%)                                         | 512 (74.3%)                                                                | 274 (60.8%)                                                               |         |                  |
| Yes                                           | 354 (31.1%)                                         | 177 (25.7%)                                                                | 177 (39.2%)                                                               |         |                  |
| COVID _ Health stressors                      |                                                     |                                                                            |                                                                           | 0.001   | CLSA Autumn 2020 |
| No                                            | 718 (63.0%)                                         | 462 (67.1%)                                                                | 256 (56.8%)                                                               |         |                  |
| Yes                                           | 422 (37.0%)                                         | 227 (32.9%)                                                                | 195 (43.2%)                                                               |         |                  |
| COVID _ Difficulties with accessing resources |                                                     |                                                                            |                                                                           | <0.001  | CLSA Autumn 2020 |
| No                                            | 948 (83.2%)                                         | 595 (86.4%)                                                                | 353 (78.3%)                                                               |         |                  |
| Yes                                           | 192 (16.8%)                                         | 94 (13.6%)                                                                 | 98 (21.7%)                                                                |         |                  |
| COVID _ Family conflict                       |                                                     |                                                                            |                                                                           | <0.001  | CLSA Autumn 2020 |
| No                                            | 1,009 (88.5%)                                       | 635 (92.2%)                                                                | 374 (82.9%)                                                               |         |                  |
| Yes                                           | 131 (11.5%)                                         | 54 (7.8%)                                                                  | 77 (17.1%)                                                                |         |                  |
| COVID _ Other family Issues                   |                                                     |                                                                            |                                                                           | 0.008   | CLSA Autumn 2020 |
| No                                            | 488 (42.8%)                                         | 317 (46.0%)                                                                | 171 (37.9%)                                                               |         |                  |
| Yes                                           | 652 (57.2%)                                         | 372 (54.0%)                                                                | 280 (62.1%)                                                               |         |                  |
| COVID _ Health care                           |                                                     |                                                                            |                                                                           | 0.004   | CLSA Autumn 2020 |
| No                                            | 795 (69.7%)                                         | 503 (73.0%)                                                                | 292 (64.7%)                                                               |         |                  |
| Yes                                           | 345 (30.3%)                                         | 186 (27.0%)                                                                | 159 (35.3%)                                                               |         |                  |
| COVID _ Medications                           |                                                     |                                                                            |                                                                           | 0.008   | CLSA Autumn 2020 |
| No                                            | 1,054 (92.5%)                                       | 649 (94.2%)                                                                | 405 (89.8%)                                                               |         |                  |

(Continued)

Table 1. (Continued)

|     | Overall sample of older adults with PUD (n = 1,140) | Older adults with PUD with no pre-pandemic history of depression (n = 689) | Older adults with PUD with a pre-pandemic history of depression (n = 451) | p-value | Source of data |
|-----|-----------------------------------------------------|----------------------------------------------------------------------------|---------------------------------------------------------------------------|---------|----------------|
| Yes | 86 (7.5%)                                           | 40 (5.8%)                                                                  | 46 (10.2%)                                                                |         |                |

Note: --- indicates a value that could not be estimated due to insufficient cell size.

<https://doi.org/10.1371/journal.pone.0289932.t001>

rarely or never/some of the time (OR = 5.99, 95% CI [2.87, 12.48],  $p < 0.001$ ). Respondents living in apartments were more likely to report depression during the pandemic than those who lived in houses (OR = 2.55, 95% CI [1.24; 5.24],  $p = 0.011$ ). Respondents with functional limitations also reported higher odds of incident depression compared to those without (OR = 2.69, 95% CI [1.43; 5.05],  $p = 0.002$ ). Experiencing COVID-19-related health stressors, such as becoming ill or having a loved one become ill or die, was significantly associated with higher odds ratio of developing incident depression (OR = 3.72, 95% CI [2.12; 6.55],  $p < 0.001$ ). Moreover, older adults with PUD who had increased verbal or physical conflict in the family during the COVID-19 pandemic had a higher odds ratio of developing incident depression (OR = 3.30, 95% CI [1.47; 7.43],  $p = 0.004$ ). Respondents who were unable to access usual healthcare had higher odds for depression (OR = 1.91, 95% CI [1.04; 3.50],  $p = 0.037$ ) compared to those who were able to access usual health care.

Table 4 presents the estimated parameters derived from the relative risk model, focusing on the depression status of older adults with a history of depression prior to the pandemic, specifically during CLSA Autumn 2020. Individuals who experienced loneliness occasionally/ all of the time during the initial months of the COVID-19 pandemic exhibited an elevated risk of developing depression by Autumn 2020, with a relative risk (RR) of 1.30 (95% CI [1.03; 1.63],  $p = 0.013$ ). Older adults with functional limitations had a higher likelihood of experiencing depression compared to their counterparts without such limitations, with an RR of 1.50 (95% CI [1.17; 1.90],  $p < 0.001$ ). Moreover, respondents who reported increased levels of family conflict demonstrated a heightened probability of developing depression, with an RR of 1.52 (95% CI [1.17; 1.97],  $p < 0.001$ ). Additionally, individuals who encountered other family-related issues such as separation from family members and/or increased caregiving responsibilities had a 1.45 times higher risk of depression (RR = 1.45, 95% CI [1.05; 1.99],  $p = 0.001$ ) compared to those who did not face such issues.

## Discussion

This longitudinal study revealed that approximately 13% of older Canadians with PUD who had no previous history of depression developed depression for the first time during the COVID-19 pandemic. Among those with a lifetime history of depression, approximately 47% experienced a recurrence of depression symptoms during the pandemic. For comparison, sensitivity analyses were conducted to examine the incidence and recurrence of depression among older adults with PUD during the pre-pandemic period between the Baseline (2011–2015) and Follow-up 1 (2015–2018). Our results indicate that the incidence and recurrence of depression pre-pandemic wave were 7.5% and 37.9%, respectively, which was substantially lower than the incidence and recurrence of depression during the pandemic. The findings of this study emphasize the importance of supporting the mental health of older adults with PUD during the COVID-19 pandemic. There were several factors that were associated with incident and recurrent depression, highlighting subpopulations of older adults with PUD who may be more vulnerable to adverse mental health outcomes.

**Table 2. Cumulative incidence of depression by CLSA Autumn 2020 among older adults with PUD.**

|                                                                                          | Older adults with PUD with no history of depression who did not develop depression (n = 600) | Older adults with PUD with no history of depression who developed depression (n = 89) | p-value | Older adults with PUD with a history of depression who did not experience a recurrence of depression (n = 242) | Older adults with PUD with a history of depression who experienced a recurrence of depression (n = 209) | p-value |
|------------------------------------------------------------------------------------------|----------------------------------------------------------------------------------------------|---------------------------------------------------------------------------------------|---------|----------------------------------------------------------------------------------------------------------------|---------------------------------------------------------------------------------------------------------|---------|
| History of depression prior to pandemic                                                  |                                                                                              |                                                                                       | <0.001  |                                                                                                                |                                                                                                         | <0.001  |
| No history of depression                                                                 | 600 (87.1%)                                                                                  | 89 (12.9%)                                                                            |         | -                                                                                                              | -                                                                                                       |         |
| Any history of depression                                                                |                                                                                              |                                                                                       |         | 242 (53.7%)                                                                                                    | 209 (46.3%)                                                                                             |         |
| Reported diagnosed by a health professional but not depressed at Baseline or Follow-up 1 | -                                                                                            | -                                                                                     |         | 110 (71.0%)                                                                                                    | 45 (29.0%)                                                                                              |         |
| Depressed at Baseline                                                                    | -                                                                                            | -                                                                                     |         | 57 (55.9%)                                                                                                     | 45 (44.1%)                                                                                              |         |
| Depressed at Follow-up 1                                                                 | -                                                                                            | -                                                                                     |         | 45 (50.0%)                                                                                                     | 45 (50.0%)                                                                                              |         |
| Depressed at Baseline and Follow-up 1                                                    | -                                                                                            | -                                                                                     |         | 30 (28.8%)                                                                                                     | 74 (71.2%)                                                                                              |         |
| Age                                                                                      | 64.92 (8.95)                                                                                 | 64.31 (8.89)                                                                          | 0.550   | 63.15 (8.97)                                                                                                   | 62.52 (9.36)                                                                                            | 0.465   |
| Sex                                                                                      |                                                                                              |                                                                                       | 0.002   |                                                                                                                |                                                                                                         | 0.945   |
| Male                                                                                     | 340 (90.9%)                                                                                  | 34 (9.1%)                                                                             |         | 91 (54.2%)                                                                                                     | 77 (45.8%)                                                                                              |         |
| Female                                                                                   | 260 (82.5%)                                                                                  | 55 (17.5%)                                                                            |         | 151 (53.4%)                                                                                                    | 132 (46.6%)                                                                                             |         |
| Marital status                                                                           |                                                                                              |                                                                                       | 0.740   |                                                                                                                |                                                                                                         | 0.020   |
| Married/Common-law                                                                       | 431 (87.6%)                                                                                  | 61 (12.4%)                                                                            |         | 155 (58.3%)                                                                                                    | 111 (41.7%)                                                                                             |         |
| Separated/Divorced/Widowed                                                               | 127 (86.4%)                                                                                  | 20 (13.6%)                                                                            |         | 56 (43.4%)                                                                                                     | 73 (56.6%)                                                                                              |         |
| Single                                                                                   | 42 (84.0%)                                                                                   | 8 (16.0%)                                                                             |         | 31 (55.4%)                                                                                                     | 25 (44.6%)                                                                                              |         |
| Immigrant status                                                                         |                                                                                              |                                                                                       | 0.117   |                                                                                                                |                                                                                                         | 0.628   |
| No                                                                                       | 480 (86.0%)                                                                                  | 78 (14.0%)                                                                            |         | 211 (54.2%)                                                                                                    | 178 (45.8%)                                                                                             |         |
| Yes                                                                                      | 120 (91.6%)                                                                                  | 11 (8.4%)                                                                             |         | 31 (50.0%)                                                                                                     | 31 (50.0%)                                                                                              |         |
| Visible minority status                                                                  |                                                                                              |                                                                                       | 1.000   |                                                                                                                |                                                                                                         | 1.000   |
| No                                                                                       | 571 (87.0%)                                                                                  | 85 (13.0%)                                                                            |         | 231 (53.6%)                                                                                                    | 200 (46.4%)                                                                                             |         |
| Yes                                                                                      | ----                                                                                         | ----                                                                                  |         | 11 (55.0%)                                                                                                     | 9 (45.0%)                                                                                               |         |
| Education                                                                                |                                                                                              |                                                                                       | 0.291   |                                                                                                                |                                                                                                         | 0.566   |
| Less than secondary school                                                               | 37 (86.0%)                                                                                   | 6 (14.0%)                                                                             |         | 22 (61.1%)                                                                                                     | 14 (38.9%)                                                                                              |         |
| Secondary and some post-secondary                                                        | 96 (82.8%)                                                                                   | 20 (17.2%)                                                                            |         | 44 (50.6%)                                                                                                     | 43 (49.4%)                                                                                              |         |
| Post-secondary degree/diploma                                                            | 467 (88.1%)                                                                                  | 63 (11.9%)                                                                            |         | 176 (53.7%)                                                                                                    | 152 (46.3%)                                                                                             |         |
| Household income                                                                         |                                                                                              |                                                                                       | 0.240   |                                                                                                                |                                                                                                         | 0.320   |
| Less than \$50,000                                                                       | 117 (84.2%)                                                                                  | 22 (15.8%)                                                                            |         | 80 (51.6%)                                                                                                     | 75 (48.4%)                                                                                              |         |
| \$50,000–\$99,999                                                                        | 239 (86.3%)                                                                                  | 38 (13.7%)                                                                            |         | 87 (53.0%)                                                                                                     | 77 (47.0%)                                                                                              |         |
| \$100,000 or more                                                                        | 202 (88.2%)                                                                                  | 27 (11.8%)                                                                            |         | 68 (59.6%)                                                                                                     | 46 (40.4%)                                                                                              |         |
| Missing                                                                                  | ----                                                                                         | ----                                                                                  |         | 7 (38.9%)                                                                                                      | 11 (61.1%)                                                                                              |         |
| House ownership                                                                          |                                                                                              |                                                                                       | 0.165   |                                                                                                                |                                                                                                         | 0.440   |
| Rent                                                                                     | 69 (90.8%)                                                                                   | 7 (9.2%)                                                                              |         | 55 (50.5%)                                                                                                     | 54 (49.5%)                                                                                              |         |
| Own with mortgage                                                                        | 158 (90.3%)                                                                                  | 17 (9.7%)                                                                             |         | 69 (50.0%)                                                                                                     | 69 (50.05%)                                                                                             |         |
| Own without mortgage                                                                     | 364 (85.4%)                                                                                  | 62 (14.6%)                                                                            |         | 113 (57.7%)                                                                                                    | 83 (42.3%)                                                                                              |         |
| Missing                                                                                  | ----                                                                                         | ----                                                                                  |         | ----                                                                                                           | ----                                                                                                    |         |
| Total saving                                                                             |                                                                                              |                                                                                       | 0.914   |                                                                                                                |                                                                                                         | 0.087   |
| Less than \$49,999                                                                       | 97 (88.2%)                                                                                   | 13 (11.8%)                                                                            |         | 62 (45.3%)                                                                                                     | 75 (54.7%)                                                                                              |         |

(Continued)

Table 2. (Continued)

|                                              | Older adults with PUD with no history of depression who did not develop depression (n = 600) | Older adults with PUD with no history of depression who developed depression (n = 89) | p-value | Older adults with PUD with a history of depression who did not experience a recurrence of depression (n = 242) | Older adults with PUD with a history of depression who experienced a recurrence of depression (n = 209) | p-value |
|----------------------------------------------|----------------------------------------------------------------------------------------------|---------------------------------------------------------------------------------------|---------|----------------------------------------------------------------------------------------------------------------|---------------------------------------------------------------------------------------------------------|---------|
| \$50,000–\$99,999                            | 72 (86.7%)                                                                                   | 11 (13.3%)                                                                            |         | 35 (52.2%)                                                                                                     | 32 (47.8%)                                                                                              |         |
| \$100,000 or more                            | 380 (86.6%)                                                                                  | 59 (13.4%)                                                                            |         | 126 (58.3%)                                                                                                    | 90 (41.7%)                                                                                              |         |
| Missing                                      | 51 (89.5%)                                                                                   | 6 (10.5%)                                                                             |         | 19 (61.3%)                                                                                                     | 12 (38.7%)                                                                                              |         |
| Whether income satisfies needs               |                                                                                              |                                                                                       | 0.197   |                                                                                                                |                                                                                                         | <0.001  |
| No                                           | 30 (78.9%)                                                                                   | 8 (21.1%)                                                                             |         | 25 (34.2%)                                                                                                     | 48 (65.8%)                                                                                              |         |
| Yes                                          | 570 (87.6%)                                                                                  | 81 (12.4%)                                                                            |         | 217 (57.4%)                                                                                                    | 161 (42.6%)                                                                                             |         |
| BMI                                          |                                                                                              |                                                                                       | 0.826   |                                                                                                                |                                                                                                         | 0.769   |
| Underweight or normal weight                 | 165 (88.2%)                                                                                  | 22 (11.8%)                                                                            |         | 51 (50.5%)                                                                                                     | 50 (49.5%)                                                                                              |         |
| Overweight                                   | 265 (86.3%)                                                                                  | 42 (13.7%)                                                                            |         | 87 (54.7%)                                                                                                     | 72 (45.3%)                                                                                              |         |
| Obese                                        | 170 (87.2%)                                                                                  | 25 (12.8%)                                                                            |         | 104 (54.5%)                                                                                                    | 87 (45.5%)                                                                                              |         |
| Chronic pain                                 |                                                                                              |                                                                                       | 0.857   |                                                                                                                |                                                                                                         | <0.001  |
| No                                           | 394 (87.4%)                                                                                  | 57 (12.6%)                                                                            |         | 130 (64.7%)                                                                                                    | 71 (35.3%)                                                                                              |         |
| Yes                                          | 206 (86.6%)                                                                                  | 32 (13.4%)                                                                            |         | 112 (44.8%)                                                                                                    | 138 (55.2%)                                                                                             |         |
| Multimorbidity                               |                                                                                              |                                                                                       | 0.946   |                                                                                                                |                                                                                                         | 0.188   |
| 0                                            | 150 (88.8%)                                                                                  | 19 (11.2%)                                                                            |         | 38 (57.6%)                                                                                                     | 28 (42.4%)                                                                                              |         |
| 1                                            | 180 (85.7%)                                                                                  | 30 (14.3%)                                                                            |         | 65 (62.5%)                                                                                                     | 39 (37.5%)                                                                                              |         |
| 2                                            | 126 (86.3%)                                                                                  | 20 (13.7%)                                                                            |         | 60 (53.1%)                                                                                                     | 53 (46.9%)                                                                                              |         |
| 3+                                           | 121 (87.7%)                                                                                  | 17 (12.3%)                                                                            |         | 71 (47.0%)                                                                                                     | 80 (53.0%)                                                                                              |         |
| Missing                                      | ----                                                                                         | ----                                                                                  |         | 8 (47.1%)                                                                                                      | 9 (52.9%)                                                                                               |         |
| Feel they lack companionship                 |                                                                                              |                                                                                       | 0.005   |                                                                                                                |                                                                                                         | 0.007   |
| No                                           | 588 (87.8%)                                                                                  | 82 (12.2%)                                                                            |         | 219 (56.3%)                                                                                                    | 170 (43.7%)                                                                                             |         |
| Yes                                          | 12 (63.2%)                                                                                   | 7 (36.8%)                                                                             |         | 23 (37.1%)                                                                                                     | 39 (62.9%)                                                                                              |         |
| Feel left out                                |                                                                                              |                                                                                       | 0.019   |                                                                                                                |                                                                                                         | 0.127   |
| No                                           | 595 (87.5%)                                                                                  | 85 (12.5%)                                                                            |         | 229 (54.8%)                                                                                                    | 189 (45.2%)                                                                                             |         |
| Yes                                          | ----                                                                                         | -----                                                                                 |         | 13 (39.4%)                                                                                                     | 20 (60.6%)                                                                                              |         |
| Feel isolated from others                    |                                                                                              |                                                                                       | 0.846   |                                                                                                                |                                                                                                         | 0.009   |
| No                                           | 598 (87.2%)                                                                                  | 88 (12.8%)                                                                            |         | 232 (55.5%)                                                                                                    | 186 (44.5%)                                                                                             |         |
| Yes                                          | ----                                                                                         | ----                                                                                  |         | 10 (30.3%)                                                                                                     | 23 (69.7%)                                                                                              |         |
| Church or religious activities               |                                                                                              |                                                                                       | 0.180   |                                                                                                                |                                                                                                         | 0.002   |
| Rarely                                       | 385 (88.5%)                                                                                  | 50 (11.5%)                                                                            |         | 163 (49.1%)                                                                                                    | 169 (50.9%)                                                                                             |         |
| Often                                        | 215 (84.6%)                                                                                  | 39 (15.4%)                                                                            |         | 79 (66.4%)                                                                                                     | 40 (33.6%)                                                                                              |         |
| Religious activities at home                 |                                                                                              |                                                                                       | 0.011   |                                                                                                                |                                                                                                         | 0.038   |
| Rarely                                       | 279 (90.9%)                                                                                  | 28 (9.1%)                                                                             |         | 98 (48.0%)                                                                                                     | 106 (52.0%)                                                                                             |         |
| Often                                        | 321 (84.0%)                                                                                  | 61 (16.0%)                                                                            |         | 144 (58.3%)                                                                                                    | 103 (41.7%)                                                                                             |         |
| Adverse childhood experience                 | 0.18 (0.52)                                                                                  | 0.31 (0.76)                                                                           | 0.040   | 0.40 (0.76)                                                                                                    | 0.56 (0.92)                                                                                             | 0.039   |
| Left home in the past one month during COVID |                                                                                              |                                                                                       | 0.970   |                                                                                                                |                                                                                                         | 0.250   |
| No                                           | 45 (88.2%)                                                                                   | 6 (11.8%)                                                                             |         | 18 (43.9%)                                                                                                     | 23 (56.1%)                                                                                              |         |
| Yes                                          | 555 (87.0%)                                                                                  | 83 (13.0%)                                                                            |         | 224 (54.6%)                                                                                                    | 186 (45.4%)                                                                                             |         |
| How often do you feel lonely during COVID    |                                                                                              |                                                                                       | <0.001  |                                                                                                                |                                                                                                         | <0.001  |

(Continued)

Table 2. (Continued)

|                                               | Older adults with PUD with no history of depression who did not develop depression (n = 600) | Older adults with PUD with no history of depression who developed depression (n = 89) | p-value | Older adults with PUD with a history of depression who did not experience a recurrence of depression (n = 242) | Older adults with PUD with a history of depression who experienced a recurrence of depression (n = 209) | p-value |
|-----------------------------------------------|----------------------------------------------------------------------------------------------|---------------------------------------------------------------------------------------|---------|----------------------------------------------------------------------------------------------------------------|---------------------------------------------------------------------------------------------------------|---------|
| Rarely or never/Some of the time              | 556 (89.7%)                                                                                  | 64 (10.3%)                                                                            |         | 194 (60.6%)                                                                                                    | 126 (39.4%)                                                                                             |         |
| Occasionally/All of the time                  | 44 (63.8%)                                                                                   | 25 (36.2%)                                                                            |         | 48 (36.6%)                                                                                                     | 83 (63.4%)                                                                                              |         |
| Type of dwelling                              |                                                                                              |                                                                                       | 0.095   |                                                                                                                |                                                                                                         | 0.643   |
| House                                         | 471 (88.5%)                                                                                  | 61 (11.5%)                                                                            |         | 162 (53.5%)                                                                                                    | 141 (46.5%)                                                                                             |         |
| Apartment                                     | 119 (82.6%)                                                                                  | 25 (17.4%)                                                                            |         | 64 (56.1%)                                                                                                     | 50 (43.9%)                                                                                              |         |
| Others                                        | ----                                                                                         | ----                                                                                  |         | 16 (47.1%)                                                                                                     | 18 (52.9%)                                                                                              |         |
| Living along during the COVID-19 pandemic     |                                                                                              |                                                                                       | 0.194   |                                                                                                                |                                                                                                         | 0.034   |
| No                                            | 466 (88.1%)                                                                                  | 63 (11.9%)                                                                            |         | 170 (57.4%)                                                                                                    | 126 (42.6%)                                                                                             |         |
| Yes                                           | 134 (83.8%)                                                                                  | 26 (16.3%)                                                                            |         | 72 (46.5%)                                                                                                     | 83 (53.5%)                                                                                              |         |
| Functional limitation                         |                                                                                              |                                                                                       | 0.006   |                                                                                                                |                                                                                                         | <0.001  |
| No                                            | 457 (89.3%)                                                                                  | 55 (10.7%)                                                                            |         | 171 (62.4%)                                                                                                    | 103 (37.6%)                                                                                             |         |
| Yes                                           | 143 (80.8%)                                                                                  | 34 (19.2%)                                                                            |         | 71 (40.1%)                                                                                                     | 106 (59.95%)                                                                                            |         |
| COVID _ Health stressors                      |                                                                                              |                                                                                       | <0.001  |                                                                                                                |                                                                                                         | 0.034   |
| No                                            | 424 (91.8%)                                                                                  | 38 (8.2%)                                                                             |         | 149 (58.2%)                                                                                                    | 107 (41.8%)                                                                                             |         |
| Yes                                           | 176 (77.5%)                                                                                  | 51 (22.5%)                                                                            |         | 93 (47.7%)                                                                                                     | 102 (52.3%)                                                                                             |         |
| COVID _ Difficulties with accessing resources |                                                                                              |                                                                                       | 0.015   |                                                                                                                |                                                                                                         | 0.105   |
| No                                            | 526 (88.4%)                                                                                  | 69 (11.6%)                                                                            |         | 197 (55.8%)                                                                                                    | 156 (44.2%)                                                                                             |         |
| Yes                                           | 74 (78.7%)                                                                                   | 20 (21.3%)                                                                            |         | 45 (45.9%)                                                                                                     | 53 (54.1%)                                                                                              |         |
| COVID _ Family conflict                       |                                                                                              |                                                                                       | <0.001  |                                                                                                                |                                                                                                         | <0.001  |
| No                                            | 562 (14.7%)                                                                                  | 73 (11.5%)                                                                            |         | 222 (59.4%)                                                                                                    | 152 (40.6%)                                                                                             |         |
| Yes                                           | 38 (70.4%)                                                                                   | 16 (29.6%)                                                                            |         | 20 (26.0%)                                                                                                     | 57 (74.0%)                                                                                              |         |
| COVID _ Other family Issues                   |                                                                                              |                                                                                       | <0.001  |                                                                                                                |                                                                                                         | 0.037   |
| No                                            | 292 (92.1%)                                                                                  | 25 (7.9%)                                                                             |         | 103 (60.2%)                                                                                                    | 68 (39.8%)                                                                                              |         |
| Yes                                           | 308 (82.8%)                                                                                  | 64 (17.2%)                                                                            |         | 139 (49.6%)                                                                                                    | 141 (50.4%)                                                                                             |         |
| COVID _ Health care                           |                                                                                              |                                                                                       | 0.001   |                                                                                                                |                                                                                                         | <0.001  |
| No                                            | 452 (89.9%)                                                                                  | 51 (10.1%)                                                                            |         | 176 (60.3%)                                                                                                    | 116 (39.7%)                                                                                             |         |
| Yes                                           | 148 (79.6%)                                                                                  | 38 (20.4%)                                                                            |         | 66 (41.5%)                                                                                                     | 93 (58.5%)                                                                                              |         |
| COVID _ Medications                           |                                                                                              |                                                                                       | 0.105   |                                                                                                                |                                                                                                         | <0.001  |
| No                                            | 569 (87.7%)                                                                                  | 80 (12.3%)                                                                            |         | 234 (57.8%)                                                                                                    | 171 (42.2%)                                                                                             |         |
| Yes                                           | 31 (77.5%)                                                                                   | 9 (22.5%)                                                                             |         | 8 (17.4%)                                                                                                      | 38 (82.6%)                                                                                              |         |

Note: ---- indicates that a value could not be estimated due to insufficient cell size.

<https://doi.org/10.1371/journal.pone.0289932.t002>

Older women with PUD were approximately twice as likely to develop incident depression as their male counterparts. The high vulnerability to depression among older women has been previously identified in studies both before (e.g., [27]) and during the pandemic (e.g., [6]). The higher risk of depression identified in the current study may be partly due to declines in social interaction during the pandemic [28]. Although older women tend to have higher levels of social support than older men, a review on sex differences in depression among older adults hypothesized that older women may be more vulnerable to the absence of social support than

Table 3. Logistic regression results for incident depression among older adults with PUD with no history of depression (n = 689).

|                                      | Adjusted Odds Ratio | 95% Confidence Interval | p-value |
|--------------------------------------|---------------------|-------------------------|---------|
| Age                                  | 0.98                | [0.95; 1.02]            | 0.370   |
| Sex                                  |                     |                         |         |
| Male (ref.)                          |                     |                         |         |
| Female                               | 2.03*               | [1.13; 3.69]            | 0.021   |
| Marital status                       |                     |                         |         |
| Married/Common-law (ref.)            |                     |                         |         |
| Separated/Divorced/Widowed           | 0.63                | [0.24; 1.67]            | 0.353   |
| Single                               | 1.49                | [0.43; 5.21]            | 0.531   |
| Immigrant status                     |                     |                         |         |
| No (ref.)                            |                     |                         |         |
| Yes                                  | 0.47                | [0.21; 1.06]            | 0.068   |
| Visible minority status              |                     |                         |         |
| No (ref.)                            |                     |                         |         |
| Yes                                  | 1.94                | [0.51; 7.38]            | 0.330   |
| Education                            |                     |                         |         |
| Less than secondary school           | 1.55                | [0.45; 5.34]            | 0.487   |
| Secondary and some post-secondary    | 1.71                | [0.84; 3.49]            | 0.142   |
| Post-secondary degree/diploma (ref.) |                     |                         |         |
| Household income                     |                     |                         |         |
| Less than \$50,000 (ref.)            |                     |                         |         |
| \$50,000–\$99,999                    | 1.89                | [0.78; 4.56]            | 0.159   |
| \$100,000 or more                    | 1.57                | [0.57; 4.30]            | 0.381   |
| Missing                              | 0.17                | [0.03; 1.07]            | 0.058   |
| Dwelling ownership                   |                     |                         |         |
| Rent (ref.)                          |                     |                         |         |
| Own with mortgage                    | 1.21                | [0.35; 4.16]            | 0.760   |
| Own without mortgage                 | 2.84                | [0.91; 8.89]            | 0.072   |
| Missing                              | 4.59                | [0.59; 35.56]           | 0.145   |
| Total saving                         |                     |                         |         |
| Less than \$49,999 (ref.)            |                     |                         |         |
| \$50,000–\$99,999                    | 3.31*               | [1.07; 10.26]           | 0.038   |
| \$100,000 or more                    | 2.10                | [0.80; 5.51]            | 0.133   |
| Missing                              | 1.89                | [0.49; 7.33]            | 0.360   |
| Whether income satisfies needs       |                     |                         |         |
| No                                   | 3.67*               | [1.14; 11.82]           | 0.030   |
| Yes (ref.)                           |                     |                         |         |
| BMI                                  |                     |                         |         |
| Underweight or normal weight (ref.)  |                     |                         |         |
| Overweight                           | 1.34                | [0.69; 2.63]            | 0.386   |
| Obese                                | 0.69                | [0.32; 1.49]            | 0.341   |
| Chronic pain                         |                     |                         |         |
| No (ref.)                            |                     |                         |         |
| Yes                                  | 0.65                | [0.35; 1.18]            | 0.157   |
| Multimorbidity                       |                     |                         |         |
| 0 (ref.)                             |                     |                         |         |
| 1                                    | 1.30                | [0.62; 2.70]            | 0.486   |
| 2                                    | 1.05                | [0.45; 2.43]            | 0.917   |

(Continued)

Table 3. (Continued)

|                                               | Adjusted Odds Ratio | 95% Confidence Interval | p-value |
|-----------------------------------------------|---------------------|-------------------------|---------|
| 3+                                            | 0.87                | [0.37; 2.07]            | 0.753   |
| Missing                                       | 1.44                | [0.33; 6.25]            | 0.630   |
| Feel they lack companionship                  |                     |                         |         |
| No (ref.)                                     |                     |                         |         |
| Yes                                           | 4.22                | [0.96; 18.61]           | 0.057   |
| Feel left out                                 |                     |                         |         |
| No (ref.)                                     |                     |                         |         |
| Yes                                           | 2.74                | [0.35; 21.68]           | 0.340   |
| Feel isolated from others                     |                     |                         |         |
| No (ref.)                                     |                     |                         |         |
| Yes                                           | 0.38                | [0.01; 26.37]           | 0.654   |
| Church or religious activities                |                     |                         |         |
| Rarely                                        | 0.90                | [0.45; 1.81]            | 0.776   |
| Often (ref.)                                  |                     |                         |         |
| Religious activities at home                  |                     |                         |         |
| Rarely                                        | 0.62                | [0.31; 1.27]            | 0.192   |
| Often (ref.)                                  |                     |                         |         |
| Adverse childhood experience                  |                     |                         |         |
| 1.12                                          |                     | [0.72; 1.74]            | 0.607   |
| Left home in the past one month during COVID  |                     |                         |         |
| No (ref.)                                     |                     |                         |         |
| Yes                                           | 1.34                | [0.45; 4.00]            | 0.596   |
| How often do you feel lonely during COVID     |                     |                         |         |
| Rarely or never/Some of the time (ref.)       |                     |                         |         |
| Occasionally/All of the time                  | 5.99***             | [2.87; 12.48]           | <0.001  |
| Type of dwelling                              |                     |                         |         |
| House (ref.)                                  |                     |                         |         |
| Apartment                                     | 2.55*               | [1.24; 5.24]            | 0.011   |
| Others                                        | 5.61*               | [1.08; 29.03]           | 0.040   |
| Living alone during the COVID-19 pandemic     |                     |                         |         |
| No (ref.)                                     |                     |                         |         |
| Yes                                           | 0.90                | [0.35; 2.32]            | 0.829   |
| Functional limitation scale                   |                     |                         |         |
| No (ref.)                                     |                     |                         |         |
| Yes                                           | 2.69**              | [1.43; 5.05]            | 0.002   |
| COVID _ Health stressors                      |                     |                         |         |
| No (ref.)                                     |                     |                         |         |
| Yes                                           | 3.72***             | [2.12; 6.55]            | <0.001  |
| COVID _ Difficulties with accessing resources |                     |                         |         |
| No (ref.)                                     |                     |                         |         |
| Yes                                           | 1.39                | [0.67; 2.91]            | 0.375   |
| COVID _ Family conflict                       |                     |                         |         |
| No (ref.)                                     |                     |                         |         |
| Yes                                           | 3.30**              | [1.47; 7.43]            | 0.004   |
| COVID _ Other family Issues                   |                     |                         |         |
| No (ref.)                                     |                     |                         |         |
| Yes                                           | 1.38                | [0.75; 2.55]            | 0.298   |
| COVID _ Health care                           |                     |                         |         |

(Continued)

Table 3. (Continued)

|                                 | Adjusted Odds Ratio | 95% Confidence Interval | p-value |
|---------------------------------|---------------------|-------------------------|---------|
| No (ref.)                       |                     |                         |         |
| Yes                             | 1.91*               | [1.04; 3.50]            | 0.037   |
| COVID _ Medications             |                     |                         |         |
| No (ref.)                       |                     |                         |         |
| Yes                             | 1.04                | [0.38; 2.86]            | 0.942   |
| Likelihood ratio test statistic | 139.57***           |                         |         |
| Nagelkerke R square             | 0.342               |                         |         |

\*p &lt;0.05

\*\*p &lt;0.01

\*\*\*p &lt;0.001

<https://doi.org/10.1371/journal.pone.0289932.t003>

their male counterparts [29]. Similarly, a study by Carayanni and colleagues [30] found that social support factors, such as regularly engaging in outings and excursions, were protective against depression for older women, but not for older men. It is possible that disruptions to socializing due to extended lockdowns disproportionately harmed older women. This is supported by the emerging research that has found higher levels of loneliness among older women compared to older men during the pandemic [31].

Among older adults with PUD, experiencing loneliness during the first few months of the pandemic was associated with a six-fold risk for incident depression and a more than two-fold risk for recurrent depression. There is a well-established link between loneliness and depression in middle-aged and older adults [27, 32]. Prior to the COVID-19 pandemic, loneliness and social isolation had already been identified as a major public health concern compromising the physical and mental health of older adults [33], and emerging research suggests that levels of loneliness among older adults have increased during the pandemic [34]. Increases in loneliness and time spent isolated are particularly concerning for older adults with PUD, as social isolation is associated with PUD recurrence in older adults with depression [35], emphasizing the reciprocal relationship between physical and mental health outcomes in older adults with PUD.

Among those with no history of depression, individuals who had trouble financially meeting their basic needs before the pandemic had more than triple the risk of developing depression for the first time during the pandemic. The COVID-19 pandemic created unprecedented economic challenges for vulnerable groups, particularly for those who live at the intersection of different vulnerabilities, such as low-income older adults with chronic illness [36]. Although older adults often have sources of income that would not have been affected by the pandemic, such as pensions and social security, many low-income older adults maintain employment into later life to meet their financial needs. Older adults are frequently employed in industries that were disproportionately impacted by periods of lockdown, such as retail stores, which may have resulted in layoffs and reductions in scheduling [36].

Among those with PUD, functional limitations were associated with an approximately three-fold risk for both incident and recurrent depression, while chronic pain was associated with a 63% higher risk of recurrent depression only. Functional limitations and chronic pain have important implications for the mental health of older adults. There is a high comorbidity between chronic pain and depression [37]. Both conditions are highly intertwined, whereby both physical and psychological pain exacerbate the other condition [37]. These findings of the current study are consistent with other research on the effects of chronic pain on depression,



**Table 4. Relative risk regression results for depression among older adults with PUD with a history of depression (n = 451).**

|                                      | Relative Risk | 95%CI        | p-value |
|--------------------------------------|---------------|--------------|---------|
| Age                                  | 0.99          | [0.98; 1.01] | 0.338   |
| Sex                                  |               |              |         |
| Male (ref.)                          | 0.99          | [0.79; 1.26] | 0.962   |
| Female                               |               |              |         |
| Marital status                       |               |              |         |
| Married/Common-law (ref.)            | 1.08          | [0.77; 1.51] | 0.608   |
| Separated/Divorced/Widowed           | 0.93          | [0.62; 1.40] | 0.677   |
| Single                               |               |              |         |
| Immigrant status                     |               |              |         |
| No (ref.)                            | 1.23          | [0.90; 1.70] | 0.129   |
| Yes                                  |               |              |         |
| Visible minority status              |               |              |         |
| No (ref.)                            |               |              |         |
| Yes                                  | 0.86          | [0.50; 1.48] | 0.551   |
| Education                            |               |              |         |
| Less than secondary school           | 0.89          | [0.57; 1.39] | 0.557   |
| Secondary and some post-secondary    | 0.99          | [0.75; 1.31] | 0.927   |
| Post-secondary degree/diploma (ref.) |               |              |         |
| Household income                     |               |              |         |
| Less than \$49,999 (ref.)            |               |              |         |
| \$50,000–\$99,999                    | 1.25          | [0.92; 1.70] | 0.098   |
| \$100,000 or more                    | 1.12          | [0.76; 1.65] | 0.539   |
| Missing                              | 1.43          | [0.83; 2.46] | 0.126   |
| Dwelling ownership                   |               |              |         |
| Rent (ref.)                          |               |              |         |
| Own with mortgage                    | 1.09          | [0.76; 1.55] | 0.555   |
| Own without mortgage                 | 1.16          | [0.81; 1.65] | 0.359   |
| Missing                              | 0.87          | [0.35; 2.16] | 0.750   |
| Total saving                         |               |              |         |
| Less than \$50,000 (ref.)            |               |              |         |
| \$50,000–\$99,999                    | 0.85          | [0.60; 1.21] | 0.291   |
| \$100,000 or more                    | 0.79          | [0.59; 1.06] | 0.078   |
| Missing                              | 0.65          | [0.39; 1.08] | 0.064   |
| Whether income satisfies needs       |               |              |         |
| No                                   | 1.15          | [0.86; 1.54] | 0.277   |
| Yes (ref.)                           |               |              |         |
| BMI                                  |               |              |         |
| Underweight or normal weight (ref.)  |               |              |         |
| Overweight                           | 0.82          | [0.62; 1.09] | 0.132   |
| Obese                                | 0.79          | [0.59; 1.04] | 0.060   |
| Chronic pain                         |               |              |         |
| No (ref.)                            |               |              |         |
| Yes                                  | 1.24          | [0.98; 1.57] | 0.058   |
| Multimorbidity                       |               |              |         |
| 0 (ref.)                             |               |              |         |
| 1                                    | 0.98          | [0.66; 1.45] | 0.919   |

*(Continued)*

Table 4. (Continued)

|                                               | Relative Risk | 95%CI        | p-value |
|-----------------------------------------------|---------------|--------------|---------|
| 2                                             | 1.06          | [0.73; 1.54] | 0.740   |
| 3+                                            | 1.06          | [0.75; 1.51] | 0.719   |
| Missing                                       | 0.98          | [0.52; 1.84] | 0.946   |
| ACE                                           | 0.98          | [0.86; 1.12] | 0.768   |
| Feel they lack companionship                  |               |              |         |
| No (ref.)                                     |               |              |         |
| Yes                                           | 1.06          | [0.75; 1.51] | 0.666   |
| Feel left out                                 |               |              |         |
| No (ref.)                                     |               |              |         |
| Yes                                           | 0.95          | [0.60; 1.49] | 0.770   |
| Feel isolated from others                     |               |              |         |
| No (ref.)                                     |               |              |         |
| Yes                                           | 1.36          | [0.89; 2.10] | 0.046   |
| Church or religious activities                |               |              |         |
| Rarely                                        | 1.32          | [0.97; 1.80] | 0.055   |
| Often (ref.)                                  |               |              |         |
| Religious activities at home                  |               |              |         |
| Rarely                                        | 1.20          | [0.93; 1.54] | 0.114   |
| Often (ref.)                                  |               |              |         |
| Left home in the past one month during COVID  |               |              |         |
| No (ref.)                                     |               |              |         |
| Yes                                           | 0.75          | [0.52; 1.07] | 0.054   |
| How often do you feel lonely during COVID     |               |              |         |
| Rarely or never/Some of the time (ref.)       |               |              |         |
| Occasionally/All of the time                  | 1.30*         | [1.03; 1.63] | 0.013   |
| Type of dwelling                              |               |              |         |
| House (ref.)                                  |               |              |         |
| Apartment                                     | 0.84          | [0.62; 1.14] | 0.192   |
| Others                                        | 1.04          | [0.66; 1.63] | 0.845   |
| Living along during the COVID-19 pandemic     |               |              |         |
| No (ref.)                                     |               |              |         |
| Yes                                           | 1.25          | [0.89; 1.75] | 0.142   |
| Functional limitation scale                   |               |              |         |
| No (ref.)                                     |               |              |         |
| Yes                                           | 1.50***       | [1.17; 1.90] | <0.001  |
| COVID _ Health stressors                      |               |              |         |
| No (ref.)                                     |               |              |         |
| Yes                                           | 1.04          | [0.84; 1.30] | 0.688   |
| COVID _ Difficulties with accessing resources |               |              |         |
| No (ref.)                                     |               |              |         |
| Yes                                           | 0.95          | [0.73; 1.25] | 0.667   |
| COVID _ Family conflict                       |               |              |         |
| No (ref.)                                     |               |              |         |
| Yes                                           | 1.52***       | [1.17; 1.97] | <0.001  |
| COVID _ Other family Issues                   |               |              |         |
| No (ref.)                                     |               |              |         |
| Yes                                           | 1.17          | [0.92; 1.49] | 0.155   |

(Continued)

**Table 4.** (Continued)

|                     | Relative Risk | 95%CI        | p-value |
|---------------------|---------------|--------------|---------|
| COVID _ Health care |               |              |         |
| No (ref.)           |               |              |         |
| Yes                 | 1.02          | [0.80; 1.30] | 0.851   |
| COVID _ Medications |               |              |         |
| No (ref.)           |               |              |         |
| Yes                 | 1.45**        | [1.05; 1.99] | 0.001   |

\*p &lt;0.05

\*\*p &lt;0.01

\*\*\*p &lt;0.001

<https://doi.org/10.1371/journal.pone.0289932.t004>

which indicate that high levels of pain can lead to depressive symptoms, potentially due to pain's impact on physical functioning and fatigue [38]. Declines in physical functioning that lead to increased dependency have also been found to predict depression [39]. A longitudinal analysis of community-dwelling and institutionalized older adults found that those with limitations in activities of daily living (ADLs) and instrumental activities of daily living (IADLs) had significantly higher depression scores than those with no limitations [39]. Functional limitations and chronic pain often disrupt usual role activities, which is associated with lower quality of life among those with PUD [15, 16].

Older adults with PUD who reported increases in family conflict during the pandemic, such as verbal or physical conflict and/or marital breakdown, were three times more likely to develop incident depression and four times more likely to develop recurrent depression. Emerging research indicates substantial deterioration in family functioning during the pandemic [40]. COVID-19 has severely impacted many domains of life that may increase stressors among families, such as employment instability and economic precarity. When combined with increased time spent together at home in conjunction with disruptions to coping mechanisms that may reduce familial conflict, such as social support from loved ones, it is unsurprising that there may have been increases in interpersonal conflict [41]. Previous research has identified interpersonal conflict as a risk factor for depression in older adulthood [42].

There were several other COVID-19-related factors that were associated with incident and recurrent depression among older adults with PUD. Health stressors, such as being ill or having a loved one become ill during the pandemic, and/or experiencing the death of a loved one were associated with double the risk of incident depression only. Additionally, experiencing disruptions to regular health care access during COVID-19 was also associated with approximately double the risk of incident depression only. Finally, experiencing disruptions to medication access during COVID-19 was associated with a five-fold risk of recurrent depression only. The identified association between pandemic-related health stressors and depression supports other research that has found a high comorbidity between early COVID-19 infection and/or infection of a loved one and depressive symptoms [43, 44]. Additionally, the finding that disruptions to healthcare access and medication access were associated with depression reinforces issues with healthcare equity during COVID-19. There are ongoing concerns that reductions in healthcare access and shifts to telemedicine will create difficulties for managing chronic illness, particularly for older adults who may have challenges adapting to changing patterns of care [45]. Other studies have identified numerous medication-related problems for people with chronic illness during the pandemic, such as difficulty accessing medication due to doctor office closures, medication shortages, and fear of COVID-19 exposure in pharmacies

or doctor's offices, ultimately causing individuals to neglect obtaining their required medication [46]. It is essential to understand and address these issues in healthcare equity to support the mental health of older adults with PUD beyond the pandemic.

### Implications for intervention

It is important to consider interventions that can be used to support the mental health of older adults with PUD who may be vulnerable to depressive symptoms due to the COVID-19 pandemic. Usual treatments for depression, such as cognitive behavioral therapy (CBT) may be a viable and beneficial intervention for those experiencing concurrent depression and PUD, as CBT has demonstrated effectiveness for reducing depressive symptoms in older adults [47], and improving self-efficacy among older adults with chronic pain [48].

Other psychosocial interventions that have been shown to be helpful for supporting the mental well-being of older adults include mindfulness-based therapies, meditation, and problem-solving therapy (PST) [49, 50]. PST has shown to be more effective among those with later-life depression than in younger populations, in addition to individuals with comorbid conditions [49, 51], which may indicate its applicability to co-occurring depression and PUD.

Interventions that foster social connection may be particularly helpful in supporting the mental health of older adults during and beyond the COVID-19 pandemic. A recent systematic review examining potential interventions to reduce social isolation and loneliness during COVID-19 highlighted effectiveness of interventions that support social facilitation, particularly among older adults living in various congregate settings, such as assisted living and nursing homes [50]. For older adults living outside of these facilities, community care is a viable option for reducing depression in later life. Community care, a model of integrated partnership between local residents and community groups, provides older adults with social support programs, which promote the feeling of belonging and aging-friendly spaces [52]. Programs like older adult-youth partnerships, community gardens, and groups for those of particular communities and demographics, may offer a proactive option for mitigating depression among community-dwelling older adults. Creative strategies such as the above may be of particular importance moving forward when considering that many older adults have faced extended social isolation due to lockdowns and stay-at-home orders. As with any intervention, an important thread adding to its effectiveness among those who may be isolated or depressed is the active and sustained involvement of patients in their own care [53]. Practitioners should be attuned to ways in which they can curate such care to the specific needs of each older adult, such as listening to patient preferences, providing culturally competent care, and adapting to an individual's ability in cases of cognitive impairment [53].

### Limitations

The current study has several limitations. First, although the CLSA provides rich longitudinal data, the observational nature of the current study precludes assuming causation in the reported associations. Second, depression was defined using the CES-D-10, which is a self-reported measure. Although it is a frequently used valid and reliable measure, it is not equivalent to a psychiatric assessment. However, the CES-D-10 has been found to have a sensitivity of 92% when compared with diagnostic interviews [54]. Third, the generalizability of the study may have been compromised because the following groups were excluded from data collection at Baseline: residents in the Northwest Territories, the Yukon, and Nunavut, and individuals who were residing in long-term care homes at the time of the Baseline interviews. Furthermore, although CLSA participants who moved to long-term care after the Baseline interview were included in the current study, lack of data from Canadians who were living in the long-

term care system during the Baseline wave of data collection means the vulnerable subset of older adults living in long-term care settings may be under-represented. Those living in long-term care may be more susceptible to adverse mental health outcomes due to the extensive lockdown measures adopted in most long-term care settings in Canada.

## Conclusion

Despite the aforementioned limitations, the current research uses a large, longitudinal dataset to offer valuable insight into the mental health of older Canadians with PUD during the COVID-19 pandemic. As access to vaccines bring a gradual return to normalcy, clinicians should be attuned to the possible long-term mental health repercussions of COVID-19 among those experiencing chronic illness. The findings of this study indicate that many older adults with PUD may be experiencing depressive symptoms during the COVID-19 pandemic, emphasizing the need for ongoing mental health support and targeted interventions for this vulnerable population.

## Acknowledgments

This research was made possible using the data collected by the Canadian Longitudinal Study on Aging (CLSA). This research has been conducted using the CLSA Baseline Comprehensive Dataset version 6.0, Baseline Tracking Dataset version 3.7, Follow-up 1 Comprehensive Dataset version 3.0 and Follow-up 1 Tracking Dataset version 2.2, COVID-19 Questionnaire Study Dataset version 1.0 under Application ID 2104024. The CLSA is led by Drs. Parminder Raina, Christina Wolfson and Susan Kirkland. The opinions expressed in this manuscript are the author's own and do not reflect the views of the Canadian Longitudinal Study on Aging

Funding for the CLSA is provided by the Government of Canada through the Canadian Institutes of Health Research (CIHR) under grant reference: LSA 94473 and the Canada Foundation for Innovation, as well as the following provinces, Newfoundland, Nova Scotia, Quebec, Ontario, Manitoba, Alberta, and British Columbia. Funding for support of the CLSA COVID-19 questionnaire-based study is provided by the Juravinski Research Institute, Faculty of Health Sciences, McMaster University, the Provost Fund from McMaster University, the McMaster Institute for Research on Aging, the Public Health Agency of Canada/CIHR grant reference CMO 174125 and the government of Nova Scotia

## Author Contributions

**Conceptualization:** Esme Fuller-Thomson, Hannah Dolhai, Andie MacNeil, Ying Jiang, Margaret De Groh.

**Data curation:** Ying Jiang, Margaret De Groh.

**Formal analysis:** Esme Fuller-Thomson, Grace Li.

**Methodology:** Esme Fuller-Thomson, Grace Li, Ying Jiang, Margaret De Groh.

**Supervision:** Esme Fuller-Thomson, Ying Jiang, Margaret De Groh.

**Writing – original draft:** Hannah Dolhai, Andie MacNeil, Grace Li.

**Writing – review & editing:** Esme Fuller-Thomson, Hannah Dolhai, Andie MacNeil, Grace Li, Ying Jiang, Margaret De Groh.

## References

1. World Health Organization. WHO Coronavirus Disease (COVID-19) Dashboard. 2022; Available from: <https://covid19.who.int/>.
2. Government of Canada. COVID-19 Daily Epidemiology Update. 2022; Available from: <https://health-infobase.canada.ca/covid-19/epidemiological-summary-covid-19-cases.html>.
3. Ammar A, Trabelsi K, Brach M, Chtourou H, Boukhris O, Masmoudi L, et al. Effects of home confinement on mental health and lifestyle behaviours during the COVID-19 outbreak: insights from the ECLB-COVID19 multicentre study. *Biol Sport*. 2021; 38(1):9–21. <https://doi.org/10.5114/biolSport.2020.96857> PMID: 33795912
4. He M, Xian Y, Lv X, He J, Ren Y. Changes in body weight, physical activity, and lifestyle during the semi-lockdown period after the outbreak of COVID-19 in China: An online survey. *Disaster Med Public Health Prep*. 2021; 15(2):e23–e28. <https://doi.org/10.1017/dmp.2020.237> PMID: 32660669
5. Dozois DJA. Anxiety and depression in Canada during the COVID-19 pandemic: A national survey. *Can Psychol*. 2021; 62(1):136–142.
6. Ettman CK, Abdalla SM, Cohen GH, Sampson L, Vivier PM, Galea S. Prevalence of depression symptoms in US adults before and during the COVID-19 Pandemic. *JAMA Netw*. 2020; 3(9):e2019686.
7. Kim SY, Min C, Oh DJ, Choi HG. Reciprocal association between depression and peptic ulcers: Two longitudinal follow-up studies using a national sample cohort. *Sci Rep*. 2020; 10(1):1749. <https://doi.org/10.1038/s41598-020-58783-0> PMID: 32020020
8. Lee YB, Yu J, Choi HH, Jeon BS, Kim KH, Kim SW, et al. The association between peptic ulcer disease and mental health problems: A population-based study: A STROBE compliant article. *Medicine (Baltimore)*. 2017; 96(34):e7828.
9. Hsu CC, Hsu YC, Chang KH, Lee CY, Chong LW, Lin CL, et al. Depression and the risk of peptic ulcer disease: A nationwide population-based study. *Medicine (Baltimore)*. 2015; 94(51):e2333. <https://doi.org/10.1097/MD.0000000000002333> PMID: 26705225
10. Kang JM, Kim N, Lee BH, Park HK, Jo HJ, Shin CM, et al. Risk factors for peptic ulcer bleeding in terms of *Helicobacter pylori*, NSAIDs, and antiplatelet agents. *Scand J Gastroenterol*. 2011; 46(11):1295–1301. <https://doi.org/10.3109/00365521.2011.605468> PMID: 21815866
11. Narayanan M, Reddy KM, Marsicano E. Peptic ulcer disease and *helicobacter pylori* infection. *Mo Med*. 2018; 115(3):219–224. PMID: 30228726
12. Jones MP. The role of psychosocial factors in peptic ulcer disease: beyond *Helicobacter pylori* and NSAIDs. *J Psychosom Res*. 2006; 60(4):407–412. <https://doi.org/10.1016/j.jpsychores.2005.08.009> PMID: 16581366
13. Levenstein S, Rosenstock S, Jacobsen RK, Jorgensen T. Psychological stress increases risk for peptic ulcer, regardless of *Helicobacter pylori* infection or use of nonsteroidal anti-inflammatory drugs. *Clin Gastroenterol Hepatol*. 2015; 13(3):498–506.e1 <https://doi.org/10.1016/j.cgh.2014.07.052> PMID: 25111233
14. Lanas A, Chan FKL. Peptic ulcer disease. *Lancet*. 2017 August 05; 390(10094):613–624. [https://doi.org/10.1016/S0140-6736\(16\)32404-7](https://doi.org/10.1016/S0140-6736(16)32404-7) PMID: 28242110
15. Barkun A, Leontiadis G. Systematic review of the symptom burden, quality of life impairment and costs associated with peptic ulcer disease. *Am J Med*. 2010; 123(4):358–366.e2. <https://doi.org/10.1016/j.amjmed.2009.09.031> PMID: 20362756
16. Mokrowiecka A, Jurek K, Pińkowski D, Małecka-Panas E. The comparison of health-related quality of life (HRQL) in patients with GERD, peptic ulcer disease and ulcerative colitis. *Adv Med Sci*. 2006; 51:142–147. PMID: 17357295
17. Bramanti SM, Trumello C, Lombardi L, Babore A. COVID-19 and chronic disease patients: Perceived stress, worry, and emotional regulation strategies. *Rehabil Psychol*. 2021; 66(4):380–385. <https://doi.org/10.1037/rep0000409> PMID: 34591525
18. Rutland-Lawes J, Wallinheimo A-S, Evans SL. Risk factors for depression during the COVID-19 pandemic: a longitudinal study in middle-aged and older adults. *BJPsych Open*. 2021; 7(5):e161. <https://doi.org/10.1192/bjo.2021.997> PMID: 34470694
19. Lee SP, Sung I, Kim JH, Lee S, Park HS, Shim CS. Risk Factors for the presence of symptoms in peptic ulcer disease. *Clin Endosc* 2017; 50(6):578–584. <https://doi.org/10.5946/ce.2016.129> PMID: 28008163
20. MacNeil A, Li G, Jiang Y, de Groh M, Fuller-Thomson E. Incident and recurrent depression among older adults with asthma during the COVID-19 pandemic: Findings from the Canadian Longitudinal Study on Aging. *Respir Med*. 2023:107003. <https://doi.org/10.1016/j.rmed.2022.107003> PMID: 36641372
21. MacNeil A, Birk S, Villeneuve PJ, Jiang Y, de Groh M, Fuller-Thomson E. Incident and recurrent depression among adults aged 50 years and older during the COVID-19 pandemic: A longitudinal analysis of

- the Canadian Longitudinal Study on Aging. *Int J Environ Res Public Health*. 2022; 19(22):15032 <https://doi.org/10.3390/ijerph192215032> PMID: 36429749
22. Raina PS, Wolfson C, Kirkland SA, Griffith LE, Oremus M, Patterson C, et al. The Canadian Longitudinal Study on Aging (CLSA). *Canadian J Aging*. 2009; 28(3):221–229.
  23. Raina P, Wolfson C, Kirkland S, et al. Cohort profile: The Canadian Longitudinal Study on Aging (CLSA). *Int J Epidemiol*. 2019; 48(6):1752–1753j. <https://doi.org/10.1093/ije/dyz173> PMID: 31633757
  24. Andresen EM, Malmgren JA, Carter WB, Patrick DL. Screening for Depression in Well Older Adults: Evaluation of a Short Form of the CES-D. 1994; *Am J Prev Med*; 10(2):77–84.
  25. Maier A, Riedel-Heller SG, Pabst A, Luppa M. Risk factors and protective factors of depression in older people 65+. A systematic review. *PLoS One*. 2021; 16(5):e0251326 <https://doi.org/10.1371/journal.pone.0251326> PMID: 33983995
  26. Lumley T, Kronmal R, Ma S. Relative risk regression in medical research: Models, contrasts, estimators, and algorithms. 2006. UW Biostatistics Working Paper Series, 293. Available from: <https://biostats.bepress.com/uwbiostat/paper293>
  27. Raina P, Wolfson C, Kirkland S, Griffith L. The Canadian Longitudinal Study on Aging (CLSA) Report on Health and Aging in Canada: Findings from Baseline Data Collection 2010–2015. 2018. Available from: [https://www.lcerpa.org/files/clsa\\_report\\_en\\_final\\_web.pdf](https://www.lcerpa.org/files/clsa_report_en_final_web.pdf)
  28. Freedman VA, Hu M, Kasper JD. Changes in older adults' social contact during the COVID-19 pandemic. *The Journals of Gerontology: Series B*. 2022 Jul 1; 77(7):e160–6. <https://doi.org/10.1093/geronb/gbab166> PMID: 34529083
  29. Girus JS, Yang K, Ferri CV. The gender difference in depression: Are elderly women at greater risk for depression than elderly men? *Geriatrics (Basel)*. 2017 November 15; 2(4):35. <https://doi.org/10.3390/geriatrics2040035> PMID: 31011045
  30. Carayanni V, Stylianopoulou C, Koulierakis G, Babatsikou F, Koutis C. Sex differences in depression among older adults: are older women more vulnerable than men in social risk factors? The case of open care centers for older people in Greece. *Eur J Ageing*. 2012; 9(2):177–186. <https://doi.org/10.1007/s10433-012-0216-x> PMID: 28804418
  31. Savage RD, Wu W, Li J, Lawson A, Bronskill SE, Chamberlain SA, et al. Loneliness among older adults in the community during COVID-19: A cross-sectional survey in Canada. *BMJ Open*. 2021; 11(4):e044517. <https://doi.org/10.1136/bmjopen-2020-044517> PMID: 33811054
  32. Erzen E, Çikrikci Ö. The effect of loneliness on depression: A meta-analysis. *Int J Soc Psychiatry*. 2018; 64(5):427–435. <https://doi.org/10.1177/0020764018776349> PMID: 29792097
  33. Donovan NJ, Blazer D. Social isolation and loneliness in older adults: Review and commentary of a National Academies Report. *Am J Geriatr Psychiatry*. 2020; 28(12):1233–1244. <https://doi.org/10.1016/j.jagp.2020.08.005> PMID: 32919873
  34. Dahlberg L. Loneliness during the COVID-19 pandemic. *Aging Ment Health*. 2021; 25(7):1161–1164. <https://doi.org/10.1080/13607863.2021.1875195> PMID: 33491474
  35. Fang B, Yang S, Liu H, Zhang Y, Xu R, Chen G. Association between depression and subsequent peptic ulcer occurrence among older people living alone: A prospective study investigating the role of change in social engagement. *J Psychosom Res*. 2019; 122:94–103. <https://doi.org/10.1016/j.jpsychores.2019.04.002> PMID: 30975521
  36. Li Y, Mutchler JE. Older adults and the economic impact of the COVID-19 pandemic. *J Aging Soc Policy*. 2020; 32(4–5):477–487. <https://doi.org/10.1080/08959420.2020.1773191> PMID: 32543304
  37. IsHak WW, Wen RY, Naghdechi L, Vanle B, Dang J, Knosp M, et al. Pain and depression: A systematic review. *Harv Rev Psychiatry*. 2018; 26(6):352–363. <https://doi.org/10.1097/HRP.000000000000198> PMID: 30407234
  38. Hawker GA, Gignac MAM, Badley E, Davis AM, French MR, Li Y, et al. A longitudinal study to explain the pain-depression link in older adults with osteoarthritis. *Arthritis Care Res*. 2011; 63(10):1382–1390. <https://doi.org/10.1002/acr.20298> PMID: 20662042
  39. Anstey KJ, von Sanden C, Sargent-Cox K, Luszcz MA. Prevalence and risk factors for depression in a longitudinal, population-based study including individuals in the community and residential care. *Am J Geriatr Psychiatry*. 2007; 15(6):497–505. <https://doi.org/10.1097/JGP.0b013e31802e21d8> PMID: 17545450
  40. Feinberg ME, A Mogle J, Lee J, Tornello SL, Hostetler ML, Cifelli JA, et al. Impact of the COVID-19 pandemic on parent, child, and family functioning. *Fam Process*. 2022; 61(1):361–374. <https://doi.org/10.1111/famp.12649> PMID: 33830510
  41. Lebow JL. Family in the age of COVID-19. *Fam Process*. 2020; 59(2):309–312. <https://doi.org/10.1111/famp.12543> PMID: 32412686

42. Fiske A, Wetherell JL, Gatz M. Depression in older adults. *Annu Rev Clin Psychol*. 2009; 5:363–389. <https://doi.org/10.1146/annurev.clinpsy.032408.153621> PMID: 19327033
43. Ma YF, Li W, Deng HB, Wang L, Wang Y, Wang PH, et al. Prevalence of depression and its association with quality of life in clinically stable patients with COVID-19. *J Affect Disord*. 2020; 275:145–148. <https://doi.org/10.1016/j.jad.2020.06.033> PMID: 32658818
44. Mazza MG, De Lorenzo R, Conte C, Poletti S, Vai B, Bollettini I, et al. Anxiety and depression in COVID-19 survivors: Role of inflammatory and clinical predictors. *Brain Behav Immun*. 2020; 89:594–600. <https://doi.org/10.1016/j.bbi.2020.07.037> PMID: 32738287
45. Zhai Y. A call for addressing barriers to telemedicine: Health disparities during the COVID-19 pandemic. *Psychother Psychosom*. 2021; 90(1):64–66. <https://doi.org/10.1159/000509000> PMID: 32498070
46. Ismail H, Marshall VD, Patel M, Tariq M, Mohammad RA. The impact of the COVID-19 pandemic on medical conditions and medication adherence in people with chronic diseases. *J Am Pharm Assoc*. 2022; 62(3):834–839 <https://doi.org/10.1016/j.japh.2021.11.013> PMID: 34844885
47. Jayasekara R, Procter N, Harrison J, Skelton K, Hampel S, Draper R, et al. Cognitive behavioural therapy for older adults with depression: A review. *J Ment Health*. 2015; 24(3):168–171. <https://doi.org/10.3109/09638237.2014.971143> PMID: 25358075
48. Niknejad B, Bolier R, Henderson CR, Delgado D, Kozlov E, Löckenhoff CE, et al. Association between psychological interventions and chronic pain outcomes in older adults: A systematic review and meta-analysis. *JAMA Intern Med*. 2018; 178(6):830–839. <https://doi.org/10.1001/jamainternmed.2018.0756> PMID: 29801109
49. Renn BN, Areán P. Psychosocial treatment options for major depressive disorder in older adults. *Curr Treat Options Psych* 2017; 4(1):1–12. <https://doi.org/10.1007/s40501-017-0100-6> PMID: 28932652
50. Williams CYK, Townson AT, Kapur M, Ferreira AF, Nunn R, Galante J, et al. Interventions to reduce social isolation and loneliness during COVID-19 physical distancing measures: A rapid systematic review. *PLoS One*. 2021; 16(2):e0247139. <https://doi.org/10.1371/journal.pone.0247139> PMID: 33596273
51. Kirkham JG, Choi N, Seitz DP. Meta-analysis of problem solving therapy for the treatment of major depressive disorder in older adults. *Int J Geriatr Psychiatry* 2016; 31(5):526–535. <https://doi.org/10.1002/gps.4358> PMID: 26437368
52. Siegler EL, Lama SD, Knight MG, Laureano E, Reid MC. Community-based supports and services for older adults: A primer for clinicians. *J Geriatr*. 2015;678625. <https://doi.org/10.1155/2015/678625> PMID: 25729774
53. Soklaridis S, Lin E, Lalani Y, Rodak T, Sockalingam S. Mental health interventions and supports during COVID-19 and other medical pandemics: A rapid systematic review of the evidence. *Gen Hosp Psychiatry*. 2020; 66:133–146. <https://doi.org/10.1016/j.genhosppsych.2020.08.007> PMID: 32858431
54. Quiñones A, Thielke SM, Clark ME, Phillips KM, Elnitsky C, Andresen EM. Validity of Center for Epidemiologic Studies Depression (CES-D) scale in a sample of Iraq and Afghanistan Veterans. *SAGE Open Med*. 2016; 4:2050312116643906. <https://doi.org/10.1177/2050312116643906> PMID: 27127628
